# Supplementary material for: K(Mn,Zn)F3mesoporous microspheres: one-pot synthesis via the nanoscale Kirkendall effect
Source: Royal Society of Chemistry journal article supplement (doi:10.1039/c5ce02202a), 2016-01-01
Supplement: c5ce02202a1.pdf [file c5ce02202a1.pdf]

## Supplemental Information:

### **K(Mn,Zn)F<sub>3</sub> Mesoporous Microspheres: One-Pot Synthesis via the Nanoscale Kirkendall Effect**

S. Ding,<sup>1</sup> X. F. Yang,<sup>2</sup> T. T. Deng,<sup>3</sup> E. H. Song,<sup>1</sup> Z. J. Ma,<sup>1</sup> S. Ye,<sup>1</sup> M. M. Wu,<sup>3</sup> Q. Y. Zhang<sup>1,a)</sup>

*<sup>1</sup>State Key Laboratory of Luminescent Materials and Devices, and Institute of Optical  
Communication Materials, South China University of Technology, Guangzhou 510641, P. R.  
China. E-mail: qyzhang@scut.edu.cn; Fax: +86-20-87110608*

*<sup>2</sup>Analytical and Testing Center, South China University of Technology, Guangzhou 510641, P.  
R. China*

*<sup>3</sup>School of Chemistry and Chemical Engineering, and Instrumental Analysis and Research  
Centre, Sun Yat-Sen (Zhongshan) University, Guangzhou 510275, P. R. China*

---

a) Author to whom correspondence should be addressed; electronic mail:  
[qyzhang@scut.edu.cn](mailto:qyzhang@scut.edu.cn)

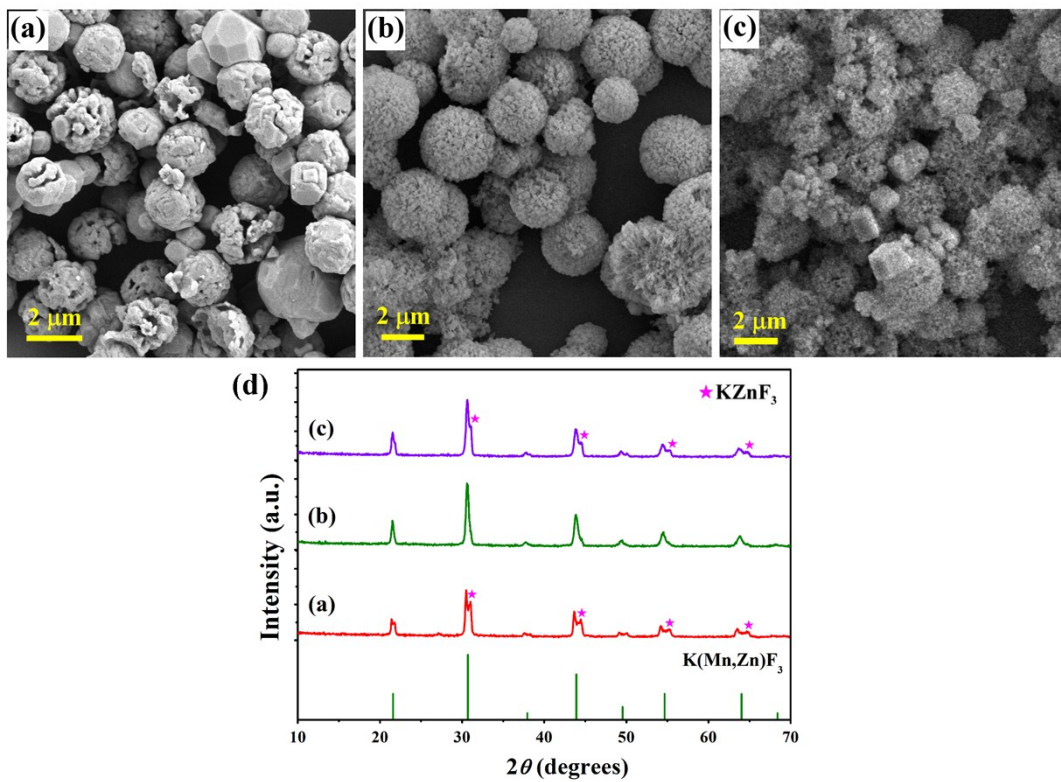

**Figure S1.** SEM images of samples obtained with different amounts of  $K_3Cit$  as chelating agent at  $220\text{ }^\circ\text{C}$  for 5 h: (a) 0 mmol, (b) 1 mmol, (c) 2 mmol, and (d) their corresponding XRD patterns.

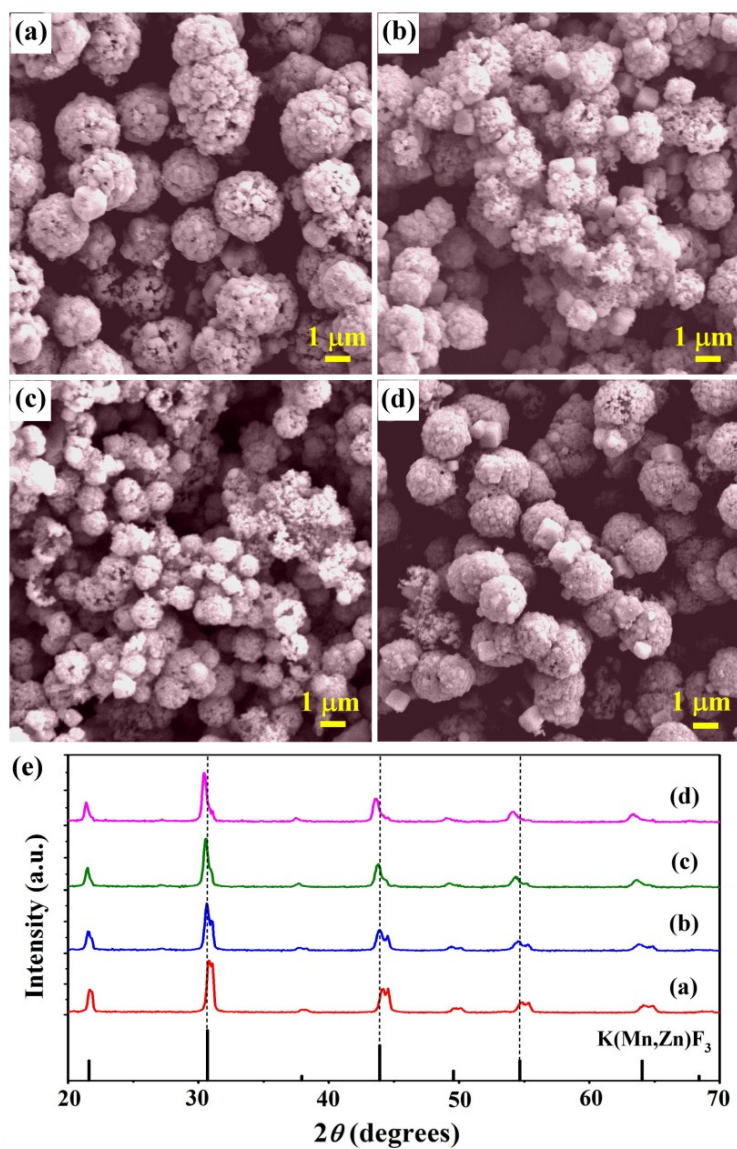

**Figure S2.** SEM images of samples obtained with different reactive species ratios ( $\text{Zn}^{2+}/\text{Mn}^{2+}$  molar ratio) at 220 °C for 5 h in the presence of 1 mmol  $\text{K}_3\text{Cit}$ : (a) 80/20 mol%, (b) 70/30 mol%, (c) 60/40 mol%, (d) 50/50 mol%, and (e) their corresponding XRD patterns.

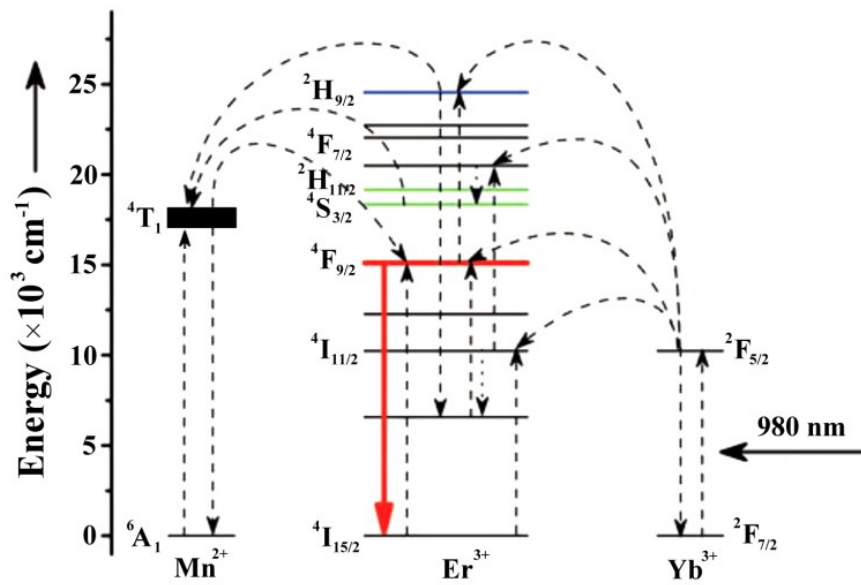

**Figure S3.** Schematic energy level diagram showing the possible up-conversion mechanism of the  $\text{K}(\text{Mn,Zn})\text{F}_3: 0.5\%\text{Yb}^{3+}, 0.5\%\text{Er}^{3+}$  microspheres under 980 nm laser excitation.

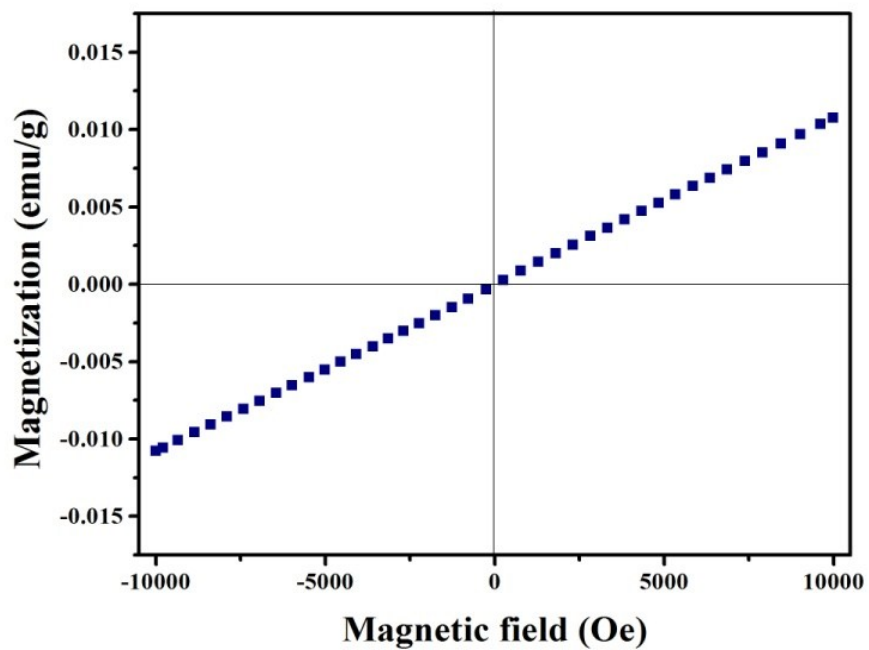

**Figure S4.** Magnetization as a function of the applied field for the porous  $\text{K}(\text{Mn},\text{Zn})\text{F}_3: \text{Yb}^{3+}, \text{Er}^{3+}$  microspheres at room temperature.

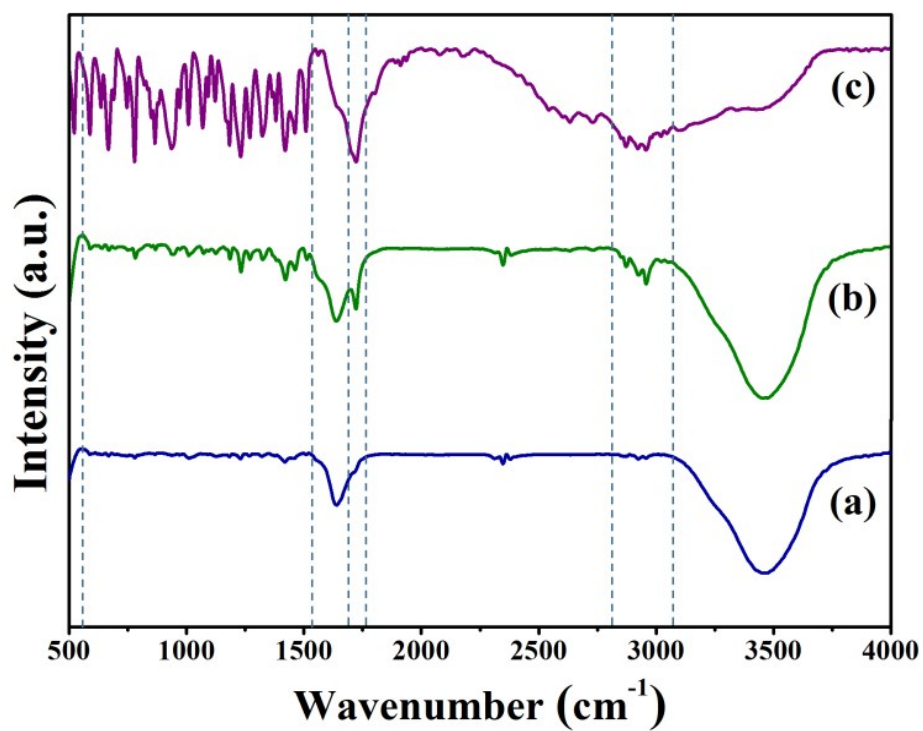

**Figure S5.** FT-IR spectra of (a)  $\text{K}(\text{Mn,Zn})\text{F}_3: \text{Yb}^{3+}, \text{Er}^{3+}$  microspheres, (b) IBU-loaded  $\text{K}(\text{Mn,Zn})\text{F}_3: \text{Yb}^{3+}, \text{Er}^{3+}$  microspheres, and (c) IBU alone.

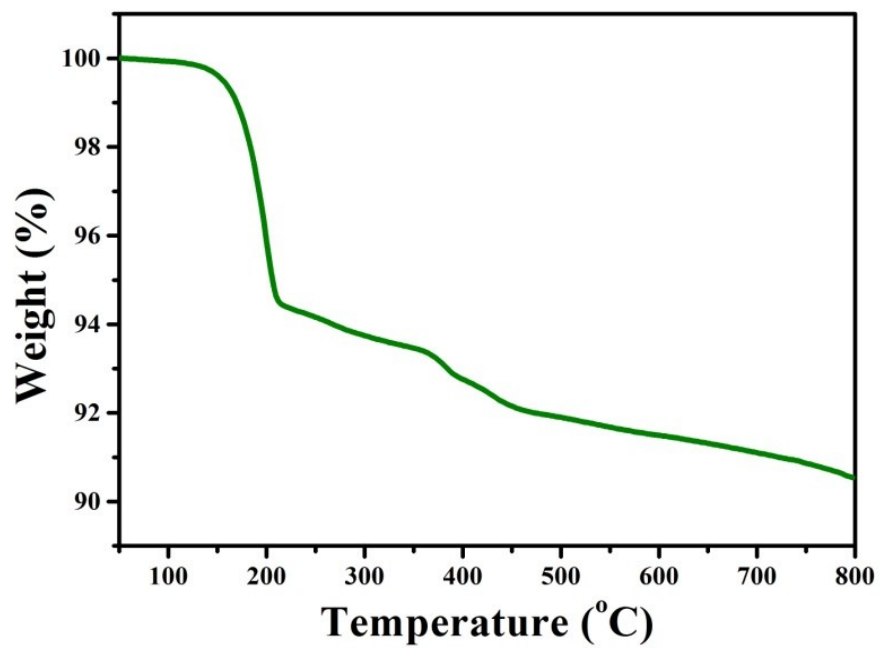

**Figure S6.** TG curve of IBU-loaded K(Mn,Zn)F<sub>3</sub>: Yb<sup>3+</sup>, Er<sup>3+</sup> microspheres.

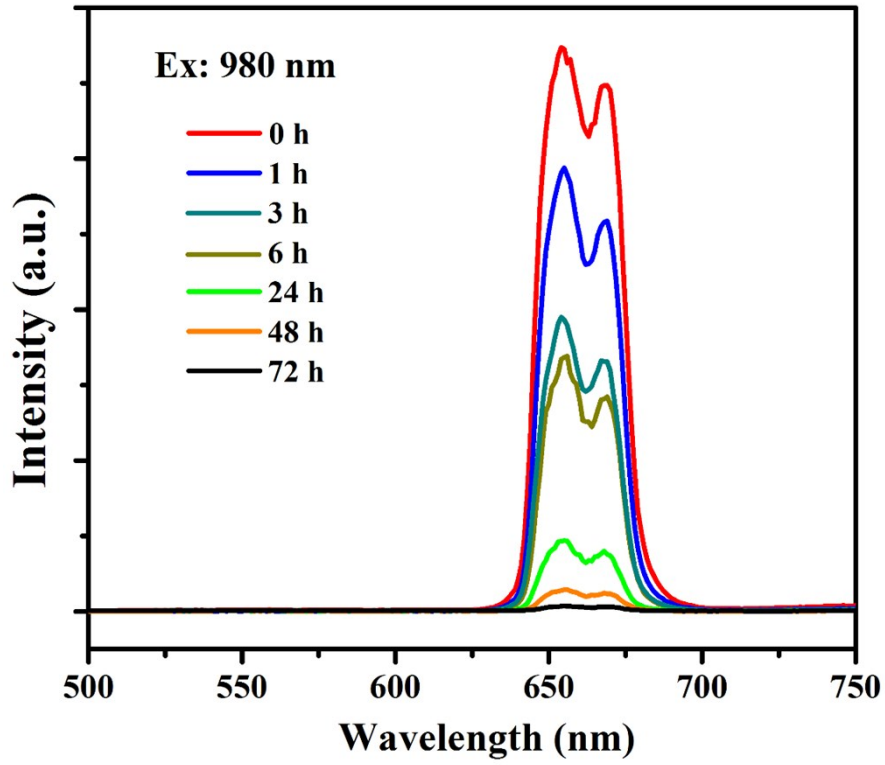

**Figure S7.** Up-conversion emission spectra of IBU-K(Mn,Zn)F<sub>3</sub>: Yb<sup>3+</sup>, Er<sup>3+</sup> microspheres in SBF buffer at different release times.



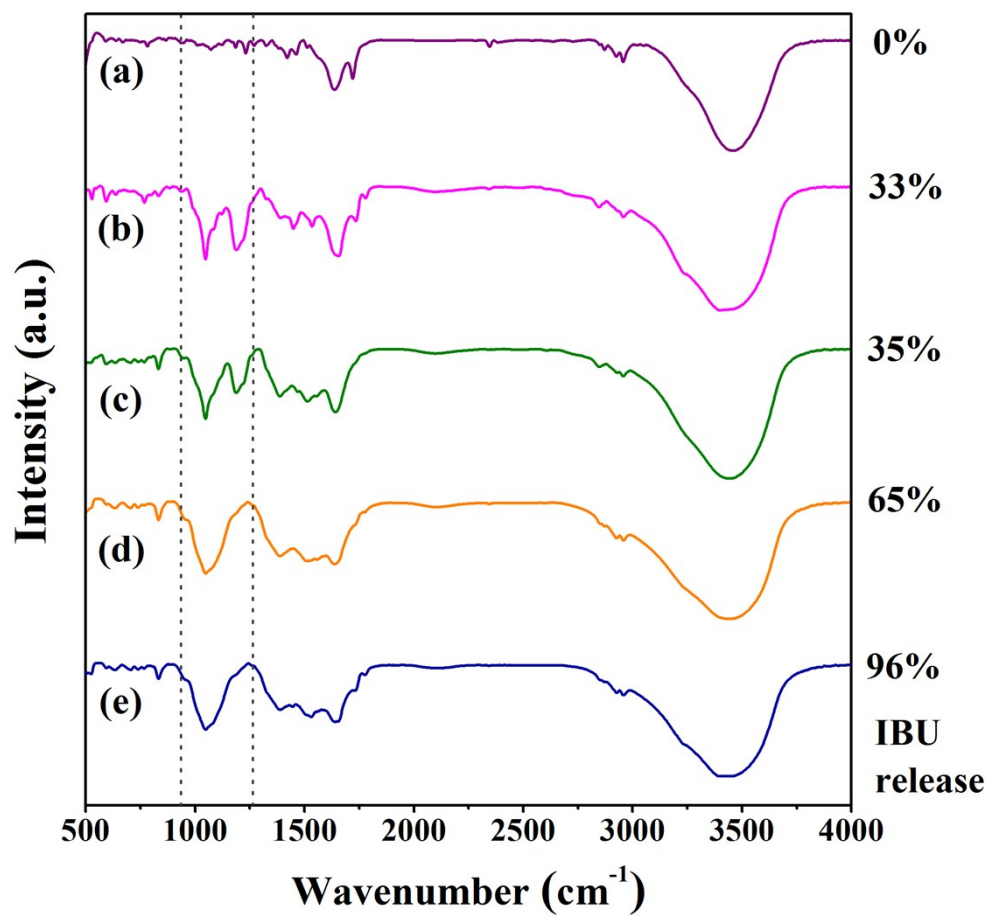

**Figure S8.** FT-IR spectra of IBU-loaded  $\text{K}(\text{Mn},\text{Zn})\text{F}_3: \text{Yb}^{3+}, \text{Er}^{3+}$  microspheres with different cumulatively released drug in SBF: (a) 0%, (b) 33%, (c) 35%, (d) 65%, (e) 96%.
